# Supplementary material
Source: Springer Nature journal article supplement (https://www.springermedizin.de/resource/supplementary/12889_2013_6429_MOESM1_ESM.pdf/9497866)

S  
a  
m  
p  
l  
e  
  
b  
r  
e  
a  
k  
d  
o  
w  
n

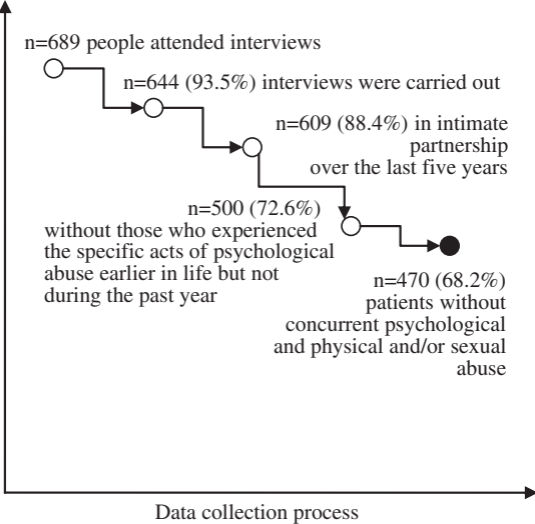

Supplement: MOESM1 [file 9497866]
